# Supplementary material
Source: Springer Nature journal article supplement (https://www.springermedizin.de/resource/supplementary/12889_2014_7014_MOESM4_ESM.pdf/9499610)

**a**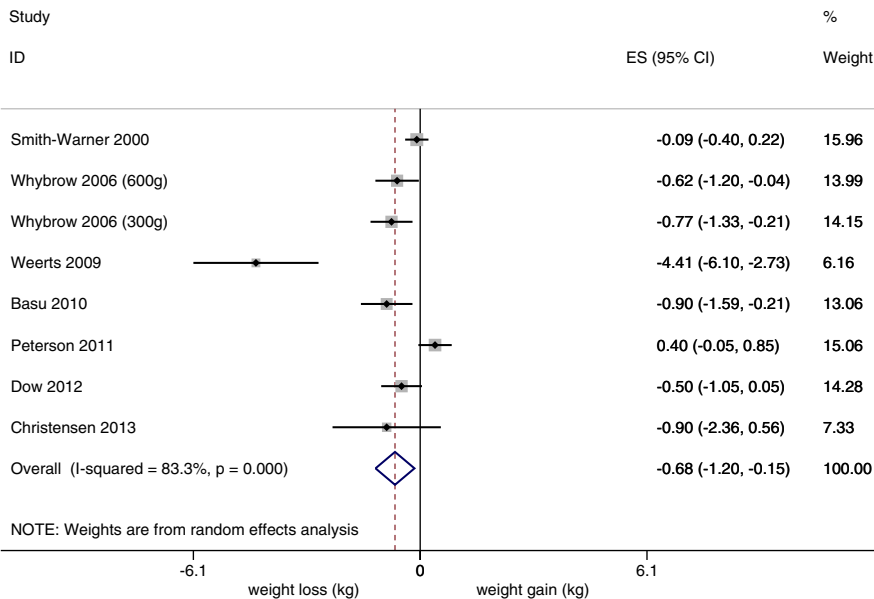**b**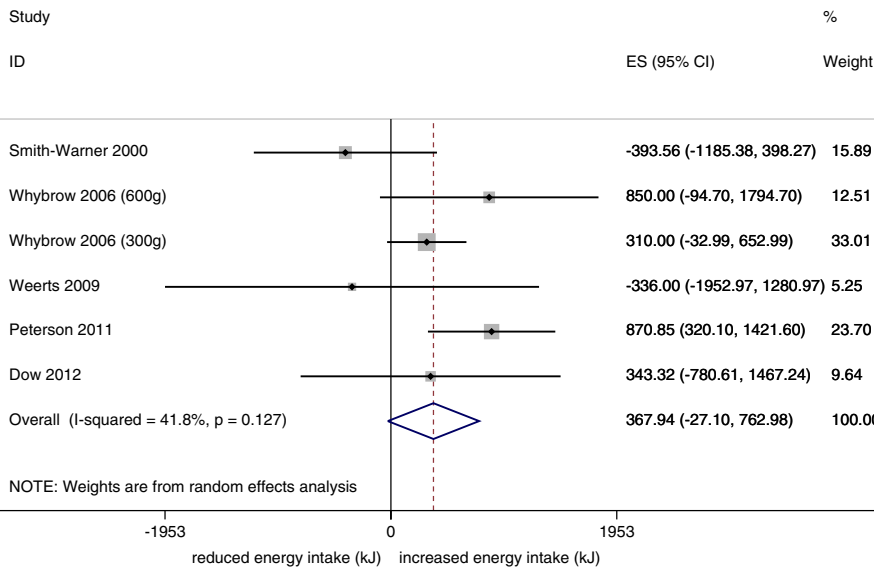

Supplement: MOESM4 [file 9499610]
